# Supplementary material for: Origin of asynchronicity in Diels–Alder reactions
Source: Royal Society of Chemistry journal article supplement (doi:10.1039/d1cp02456f), 2021-01-01
Supplement: d1cp02456f1.pdf [file d1cp02456f1.pdf]

## Supporting Information for

# Origin of Asynchronicity in Diels-Alder Reactions

Pascal Vermeeren,<sup>\*a</sup> Trevor A. Hamlin,<sup>\*a</sup> F. Matthias Bickelhaupt,<sup>\*a,b</sup>

<sup>a</sup> Department of Theoretical Chemistry, Amsterdam Institute of Molecular and Life Sciences (AIMMS), Amsterdam Center for Multiscale Modeling (ACMM), Vrije Universiteit Amsterdam, De Boelelaan 1083, 1081 HV Amsterdam, The Netherlands.

E-mail: p.vermeeren@vu.nl, t.a.hamlin@vu.nl, f.m.bickelhaupt@vu.nl

<sup>b</sup> Institute for Molecules and Materials, Radboud University Nijmegen, Heyendaalseweg 135, 6525 AJ Nijmegen, The Netherlands.

## Contents

**Fig. S1** Stationary points in the energy profile of the rotation around the C=C–C=O dihedral angle of the dienophile, without and with the various Lewis acids, used in this study in which *s-trans* is in all cases the most stable conformation, computed at ZORA-BP86/TZ2P.

**Fig. S2** (a) Activation strain analyses and (b) energy decomposition analyses of the uncatalyzed and Lewis acid-catalyzed Diels-Alder reactions of **B** with **O–LA** along the IRC (from reactants to transition state) projected onto the shorter newly forming C<sub>B</sub>•••C<sub>β</sub> bond, computed at ZORA-BP86/TZ2P.

**Table S1** LA•••O=C bond energy decomposition analyses (in kcal mol<sup>-1</sup>) and distance (in Å) in LA–acrylaldehyde (**O–LA**) complexes.

**Table S2** LA•••O=C bond energy decomposition analyses (in kcal mol<sup>-1</sup>) and distance (in Å) computed on consistent transition state-like geometries with a C<sub>B</sub>•••C<sub>β</sub> bond length between **B** and **O–LA** of 2.118Å.

**Fig. S3** Voronoi deformation density (VDD) atomic charges (in electrons) of the diene (red), dienophile (green), and Lewis acid (black), computed at consistent transition state-like geometries with a C<sub>B</sub>•••C<sub>β</sub> bond length between **B** and **O–LA** of 2.118Å at ZORA-BP86/TZ2P.

**Fig. S4** Activation strain analyses of the artificially constraint synchronous and asynchronous Diels-Alder reaction mode (rxn mode) of **B** with **O–AlCl<sub>3</sub>** (dot indicates TS) along the IRC projected onto the shorter newly forming a C<sub>B</sub>•••C<sub>β</sub> bond, computed at ZORA-BP86/TZ2P: (a) total energy, (b) strain energy, (c) interaction energy, (d) Pauli repulsion, (e) electrostatic interaction, and (f) orbital interactions.

**Fig. S5** Activation strain analyses of the artificially constraint synchronous and asynchronous Diels-Alder reaction mode (rxn mode) of **B** with **O–Li<sup>+</sup>** (dot indicates TS) along the IRC projected onto the shorter newly forming a C<sub>B</sub>•••C<sub>β</sub> bond, computed at ZORA-BP86/TZ2P: (a) total energy, (b) strain energy, (c) interaction energy, (d) Pauli repulsion, (e) electrostatic interaction, and (f) orbital interactions.

**Fig. S6** Activation strain analyses of the artificially constraint synchronous, asynchronous and stepwise Diels-Alder reaction mode (rxn mode) of **B** with **O–H<sup>+</sup>** (dot indicates TS) along the IRC projected onto the shorter newly forming a  $C_B \cdots C_\beta$  bond, computed at ZORA-BP86/TZ2P: (a) total energy, (b) strain energy, (c) interaction energy, (d) Pauli repulsion, (e) electrostatic interaction, and (f) orbital interactions.

**Fig. S7** Activation strain analyses of the artificially constraint synchronous, asynchronous and stepwise Diels-Alder reaction mode (rxn mode) of **B** with **O** and **O–Li<sup>+</sup>** (dot indicates TS) along the IRC projected onto the shorter newly forming a  $C_B \cdots C_\beta$  bond, computed at ZORA-BP86/TZ2P: (a) total energy, (b) strain energy, (c) interaction energy, (d) Pauli repulsion, (e) electrostatic interaction, and (f) orbital interactions.

**Fig. S8** (a) Normal and (b) inverse electron demand orbital interaction diagrams with key overlaps and orbital energies, at consistent transition state-like geometries (shorter  $C_B \cdots C_\beta$  bond at 2.186 Å), of the artificially constraint synchronous, asynchronous, and stepwise Diels-Alder reaction mode (rxn mode) of **B** with **O–Li<sup>+</sup>**, computed at ZORA-BP86/TZ2P.

**Fig. S9** Normal electron demand orbital interaction diagrams with key overlaps and orbital energies, at consistent transition state-like geometries (shorter  $C_B \cdots C_\beta$  bond at 2.186 Å), of the artificially constraint synchronous, asynchronous, and stepwise Diels-Alder reaction mode (rxn mode) of **B** with **O<sup>+</sup>**, computed at ZORA-BP86/TZ2P.

**Fig. S10** Key unoccupied  $\pi$ -MO (isovalue = 0.03 Bohr<sup>-3/2</sup>) computed at the equilibrium structures of (a) **O** and (b) **O–Li<sup>+</sup>**, where the MO-coefficients of the carbon and oxygen 2p<sub>z</sub> atomic orbitals, contributing to the unoccupied orbitals, are shown in the schematic  $\pi$ -MOs, computed at ZORA-BP86/TZ2P.

**Fig. S11** Activation strain analyses of the artificially constraint synchronous, asynchronous and stepwise Diels-Alder reaction mode (rxn mode) of **B** with **O** and **O–H<sup>+</sup>** (dot indicates TS) along the IRC projected onto the shorter newly forming a  $C_B \cdots C_\beta$  bond, computed at ZORA-BP86/TZ2P: (a) total energy, (b) strain energy, (c) interaction energy, (d) Pauli repulsion, (e) electrostatic interaction, and (f) orbital interactions.

**Fig. S12** (a) Normal and (b) inverse electron demand orbital interaction diagrams with key overlaps and orbital energies, at consistent transition state-like geometries (shorter  $C_B \cdots C_\beta$  bond at 2.186 Å), of the artificially constraint synchronous, asynchronous, and stepwise Diels-Alder reaction mode (rxn mode) of **B** with **O–H<sup>+</sup>**, computed at ZORA-BP86/TZ2P.

**Fig. S13** Closed-shell orbital interaction diagrams with key overlaps, at consistent transition state-like geometries (shorter  $C_B \cdots C_\beta$  bond at 2.186 Å), of the artificially constraint synchronous, asynchronous, and stepwise Diels-Alder reaction mode (rxn mode) of **B** with **O–H<sup>+</sup>**, computed at ZORA-BP86/TZ2P.

**Fig. S14** Key occupied  $\pi$ -MOs (isovalue = 0.03 Bohr<sup>-3/2</sup>) computed at the equilibrium structures of (a) **O** and (b) **O–H<sup>+</sup>**, where the MO-coefficients of the carbon and oxygen 2p<sub>z</sub> atomic orbitals, contributing to the occupied orbitals, are shown in the schematic  $\pi$ -MOs, computed at ZORA-BP86/TZ2P.

**Fig. S15** Closed-shell orbital interaction diagrams with key overlaps, at consistent transition state-like geometries (shorter  $C_B \cdots C_\beta$  bond at 2.186 Å), of the artificially constraint synchronous, asynchronous, and stepwise Diels-Alder reaction modes (rxn mode) of **B** with **O–Li<sup>+</sup>**, computed at ZORA-BP86/TZ2P.

**Table S3** Cartesian coordinates (in Å), energies (in kcal mol<sup>-1</sup>), and number of imaginary frequencies of all stationary points, computed at ZORA-BP86/TZ2P.

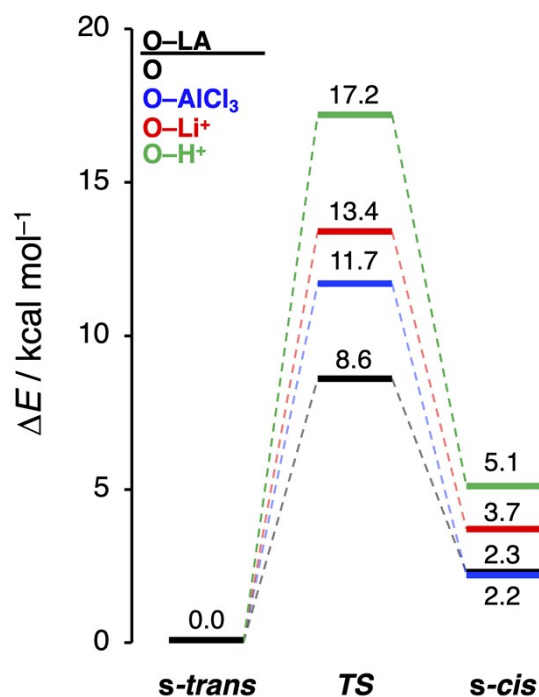

**Fig. S1** Stationary points in the energy profile of the rotation around the C=C-C=O dihedral angle of the dienophile, without and with the various Lewis acids, used in this study in which *s-trans* is in all cases the most stable conformation, computed at ZORA-BP86/TZ2P.

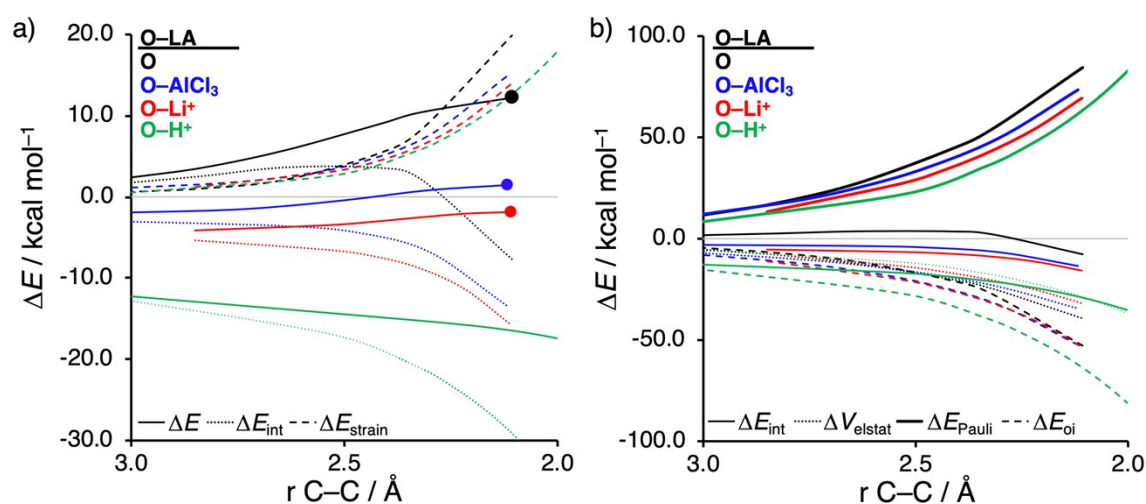

**Fig. S2** (a) Activation strain analyses and (b) energy decomposition analyses of the uncatalyzed and Lewis acid-catalyzed Diels-Alder reactions of **B** with **O-LA** along the IRC (from reactants to transition state) projected onto the shorter newly forming C<sub>B</sub>...C<sub>β</sub> bond, computed at ZORA-BP86/TZ2P.

**Table S1** LA $\cdots$ O=C bond energy decomposition analyses (in kcal mol<sup>-1</sup>) and distance (in Å) in LA–acrylaldehyde (**O–LA**) complexes.<sup>a</sup>

| <b>O–LA</b>               | $\Delta E_{\text{int}}$ | $\Delta V_{\text{elstat}}$ | $\Delta E_{\text{Pauli}}$ | $\Delta E_{\text{oi}}$ | $r(\text{LA}\cdots\text{O}=\text{C})$ |
|---------------------------|-------------------------|----------------------------|---------------------------|------------------------|---------------------------------------|
| <b>O–AlCl<sub>3</sub></b> | –35.2                   | –62.2                      | 71.3                      | –44.3                  | 1.921                                 |
| <b>O–Li<sup>+</sup></b>   | –42.1                   | –35.7                      | 15.5                      | –24.9                  | 1.753                                 |
| <b>O–H<sup>+</sup></b>    | –204.3                  | –28.4                      | 0.0                       | –175.9                 | 0.986                                 |

<sup>a</sup> Computed at ZORA-BP86/TZ2P.

**Table S2** LA $\cdots$ O=C bond energy decomposition analyses (in kcal mol<sup>-1</sup>) and distance (in Å) computed on consistent transition state-like geometries with a C<sub>B</sub> $\cdots$ C <sub>$\beta$</sub>  bond length between **B** and **O–LA** of 2.118Å.<sup>a,b</sup>

| <b>O–LA</b>               | $\Delta E_{\text{int}}$ | $\Delta V_{\text{elstat}}$ | $\Delta E_{\text{Pauli}}$ | $\Delta E_{\text{oi}}$ | $r(\text{LA}\cdots\text{O}=\text{C})$ |
|---------------------------|-------------------------|----------------------------|---------------------------|------------------------|---------------------------------------|
| <b>O–AlCl<sub>3</sub></b> | –49.5                   | –76.9                      | 85.6                      | –58.2                  | 1.850                                 |
| <b>O–Li<sup>+</sup></b>   | –60.5                   | –48.1                      | 19.5                      | –31.9                  | 1.703                                 |
| <b>O–H<sup>+</sup></b>    | –238.9                  | –45.2                      | 0.0                       | –193.6                 | 0.986                                 |

<sup>a</sup> Computed at ZORA-BP86/TZ2P. <sup>b</sup> The interacting fragments are (i) the Lewis acids and (ii) the dienophile and diene.

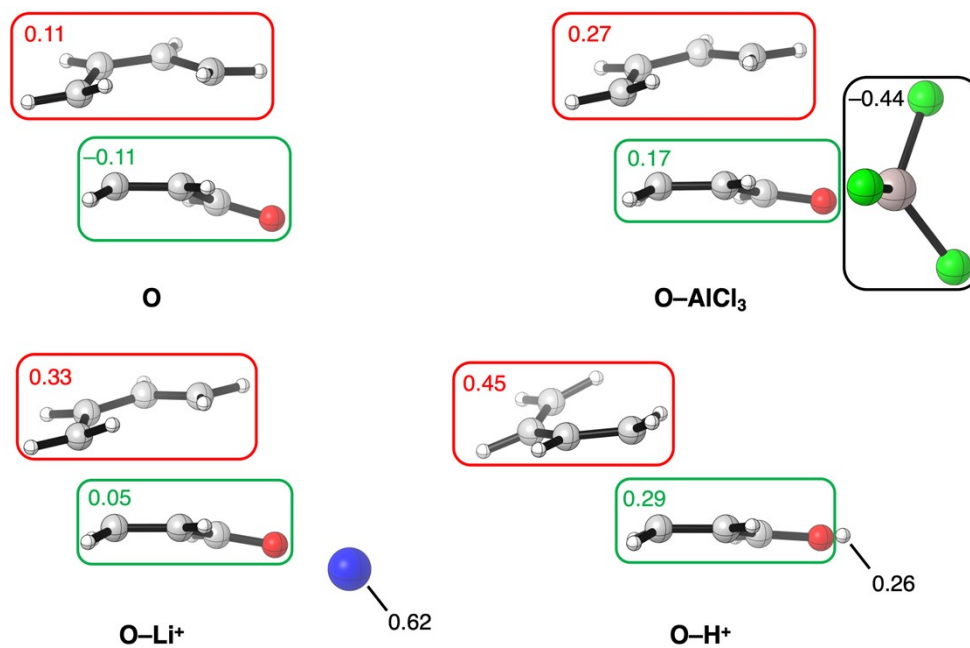

**Fig. S3** Voronoi deformation density (VDD) atomic charges (in electrons) of the diene (red), dienophile (green), and Lewis acid (black), computed at consistent transition state-like geometries with a  $C_B \cdots C_\beta$  bond length between **B** and **O-LA** of  $2.118 \text{ \AA}$  at ZORA-BP86/TZ2P.

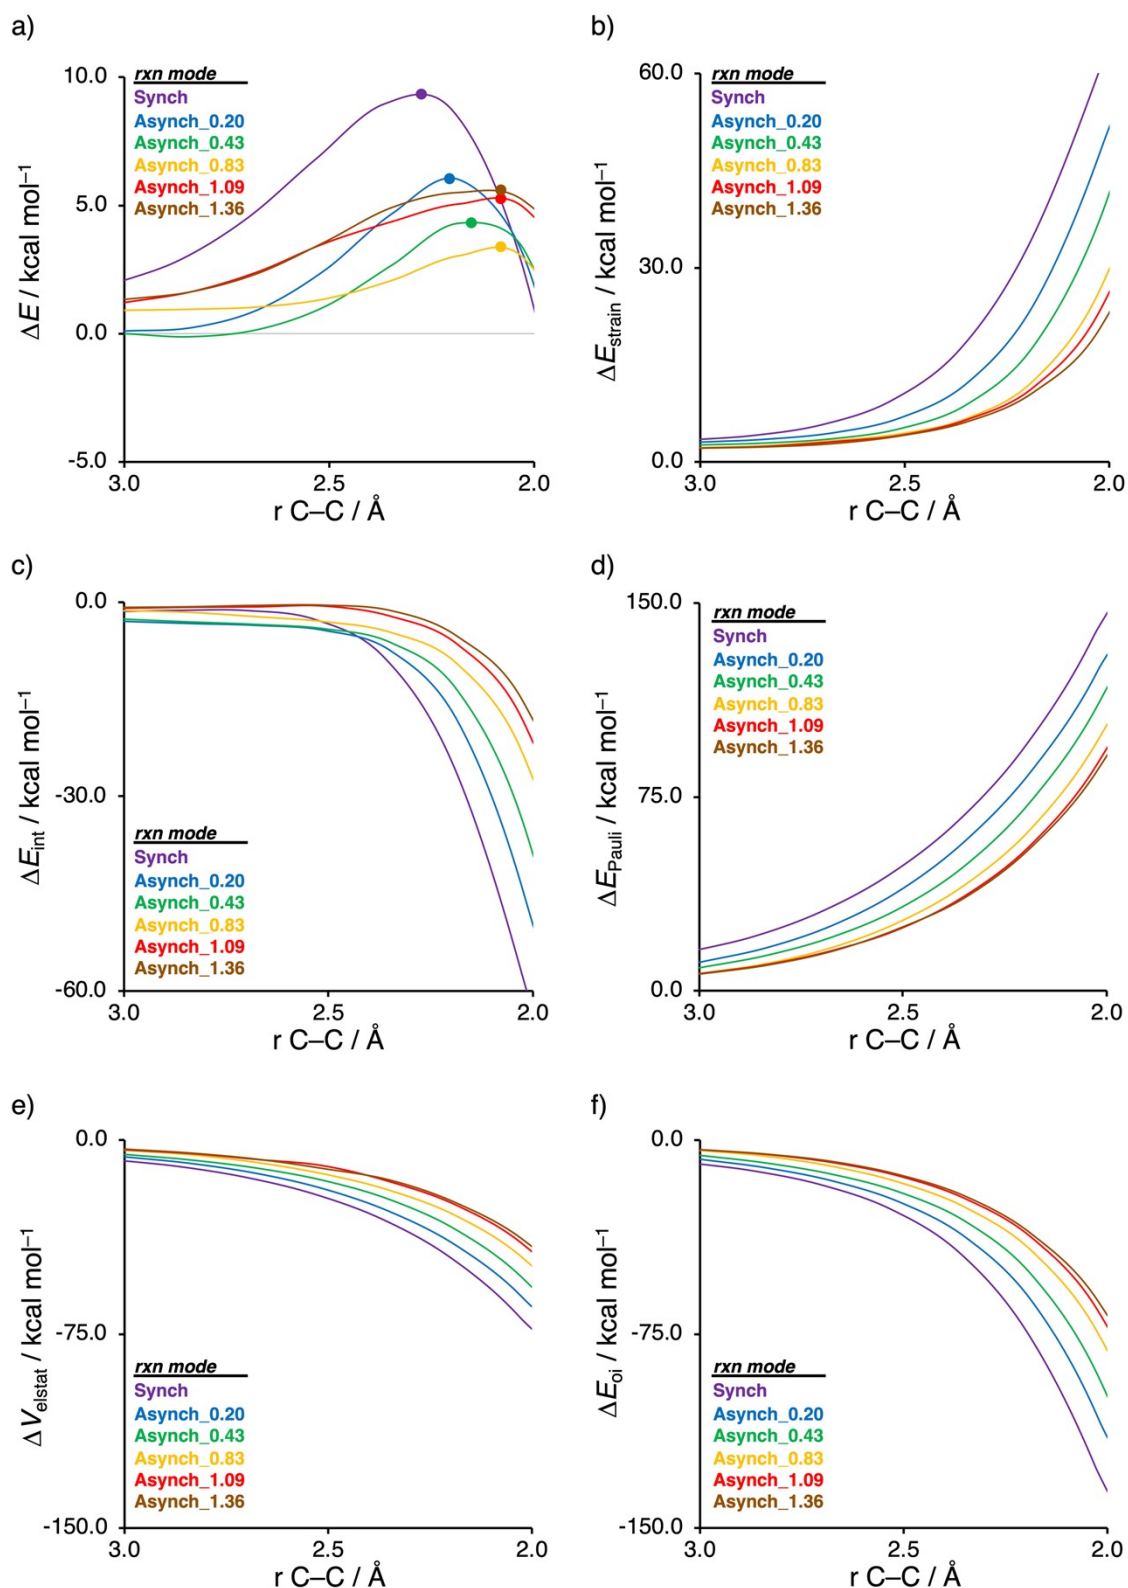

**Fig. S4** Activation strain analyses of the artificially constraint synchronous and asynchronous Diels-Alder reaction mode (rxn mode) of **B** with  $O-AlCl_3$  (dot indicates TS) along the IRC projected onto the shorter newly forming a  $C_B \cdots C_\beta$  bond, computed at ZORA-BP86/TZ2P: (a) total energy, (b) strain energy, (c) interaction energy, (d) Pauli repulsion, (e) electrostatic interaction, and (f) orbital interactions.

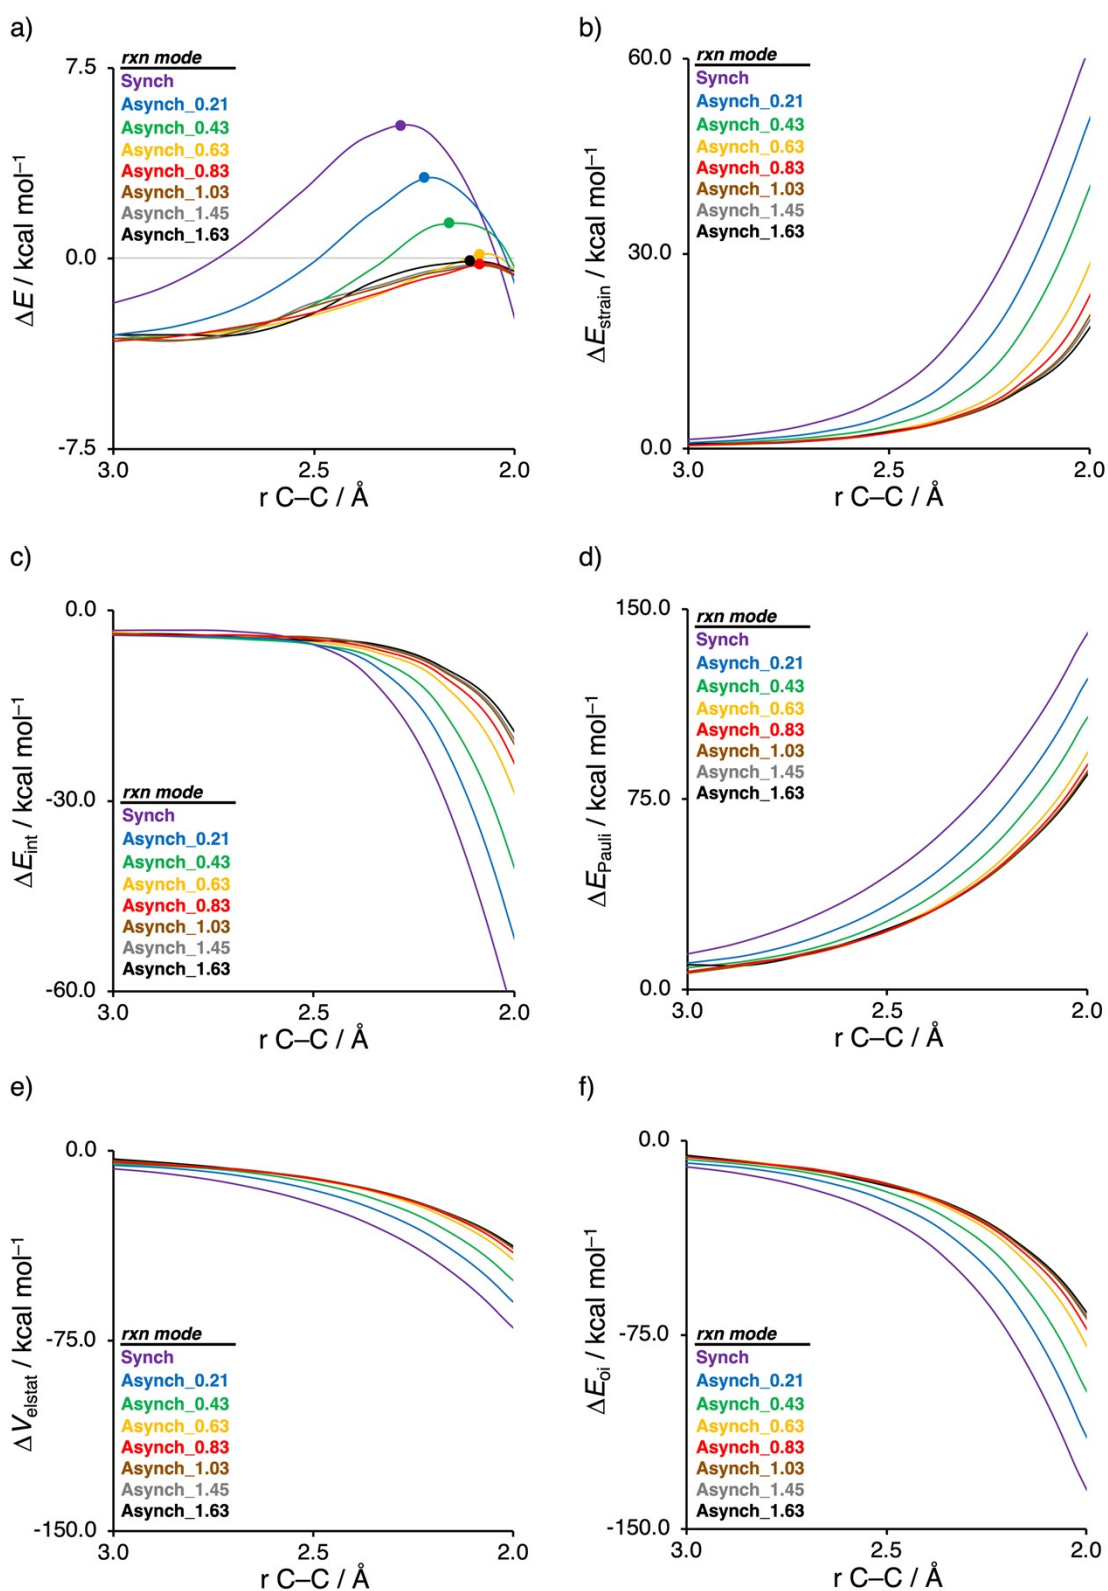

**Fig. S5** Activation strain analyses of the artificially constraint synchronous and asynchronous Diels-Alder reaction mode (rxn mode) of **B** with  $O-Li^+$  (dot indicates TS) along the IRC projected onto the shorter newly forming a  $C_B \cdots C_\beta$  bond, computed at ZORA-BP86/TZ2P: (a) total energy, (b) strain energy, (c) interaction energy, (d) Pauli repulsion, (e) electrostatic interaction, and (f) orbital interactions.



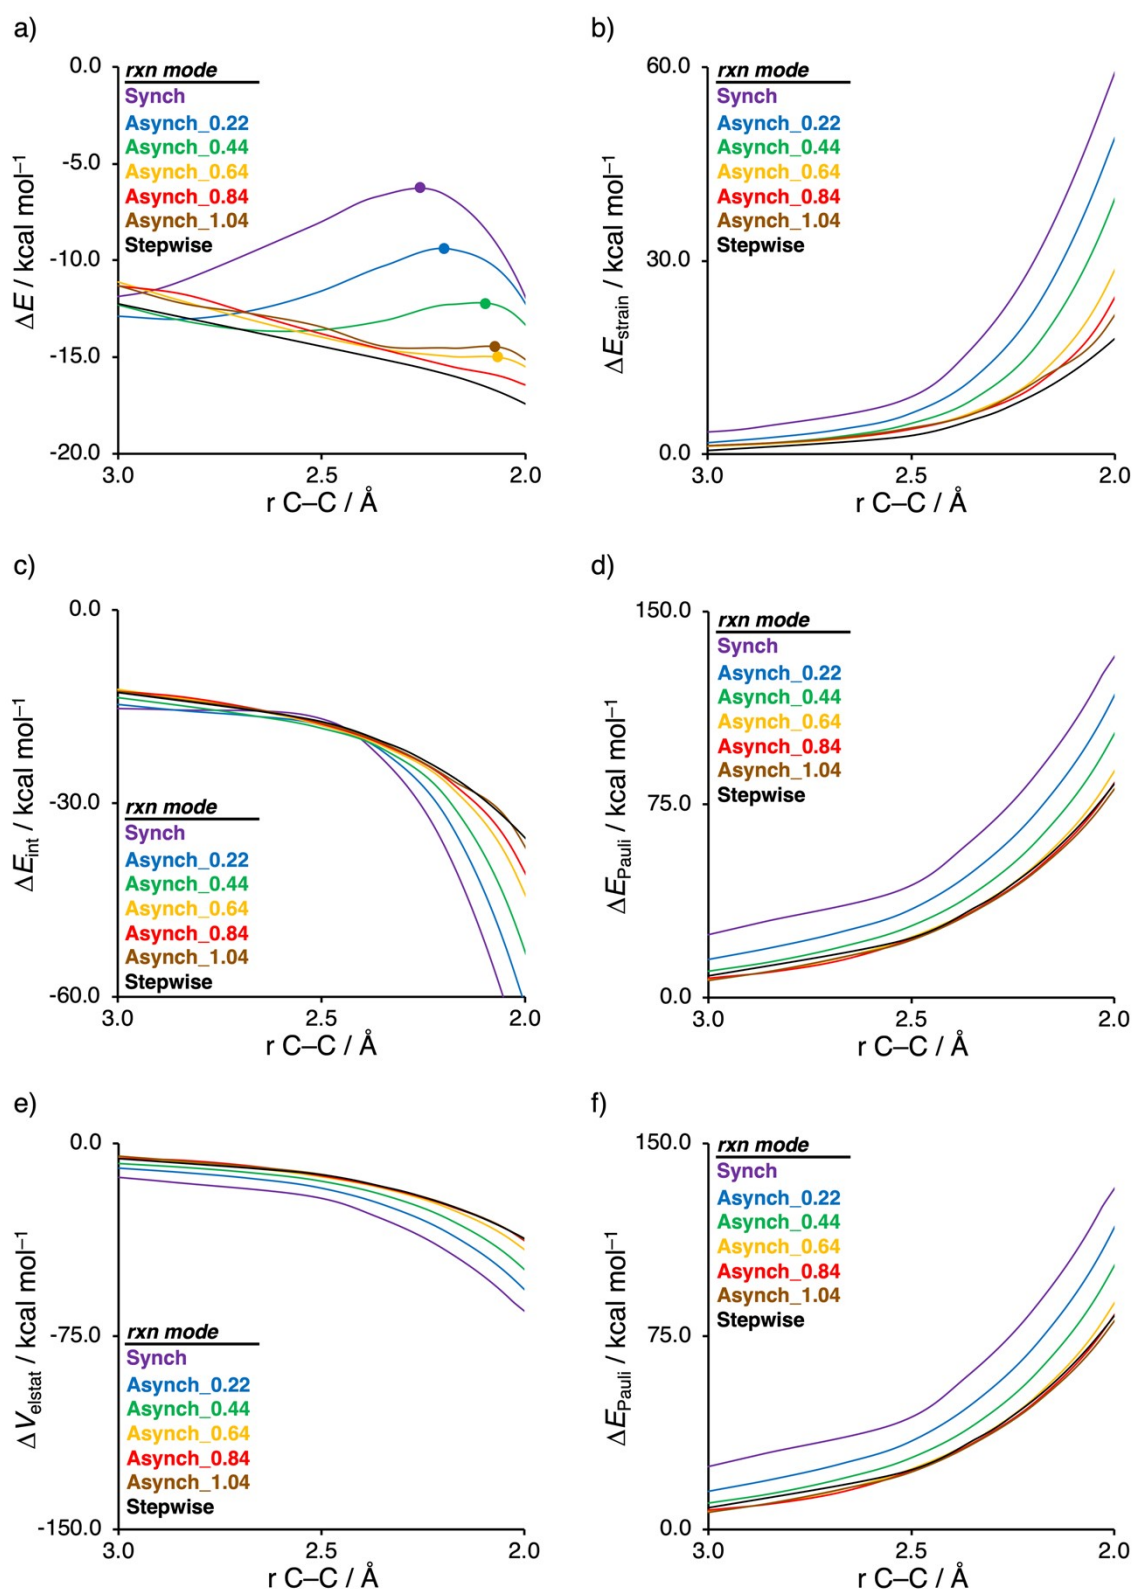

**Fig. S6** Activation strain analyses of the artificially constraint synchronous, asynchronous and stepwise Diels-Alder reaction mode (rxn mode) of **B** with  $O-H^+$  (dot indicates TS) along the IRC projected onto the shorter newly forming a  $C_B \cdots C_\beta$  bond, computed at ZORA-BP86/TZ2P: (a) total energy, (b) strain energy, (c) interaction energy, (d) Pauli repulsion, (e) electrostatic interaction, and (f) orbital interactions.

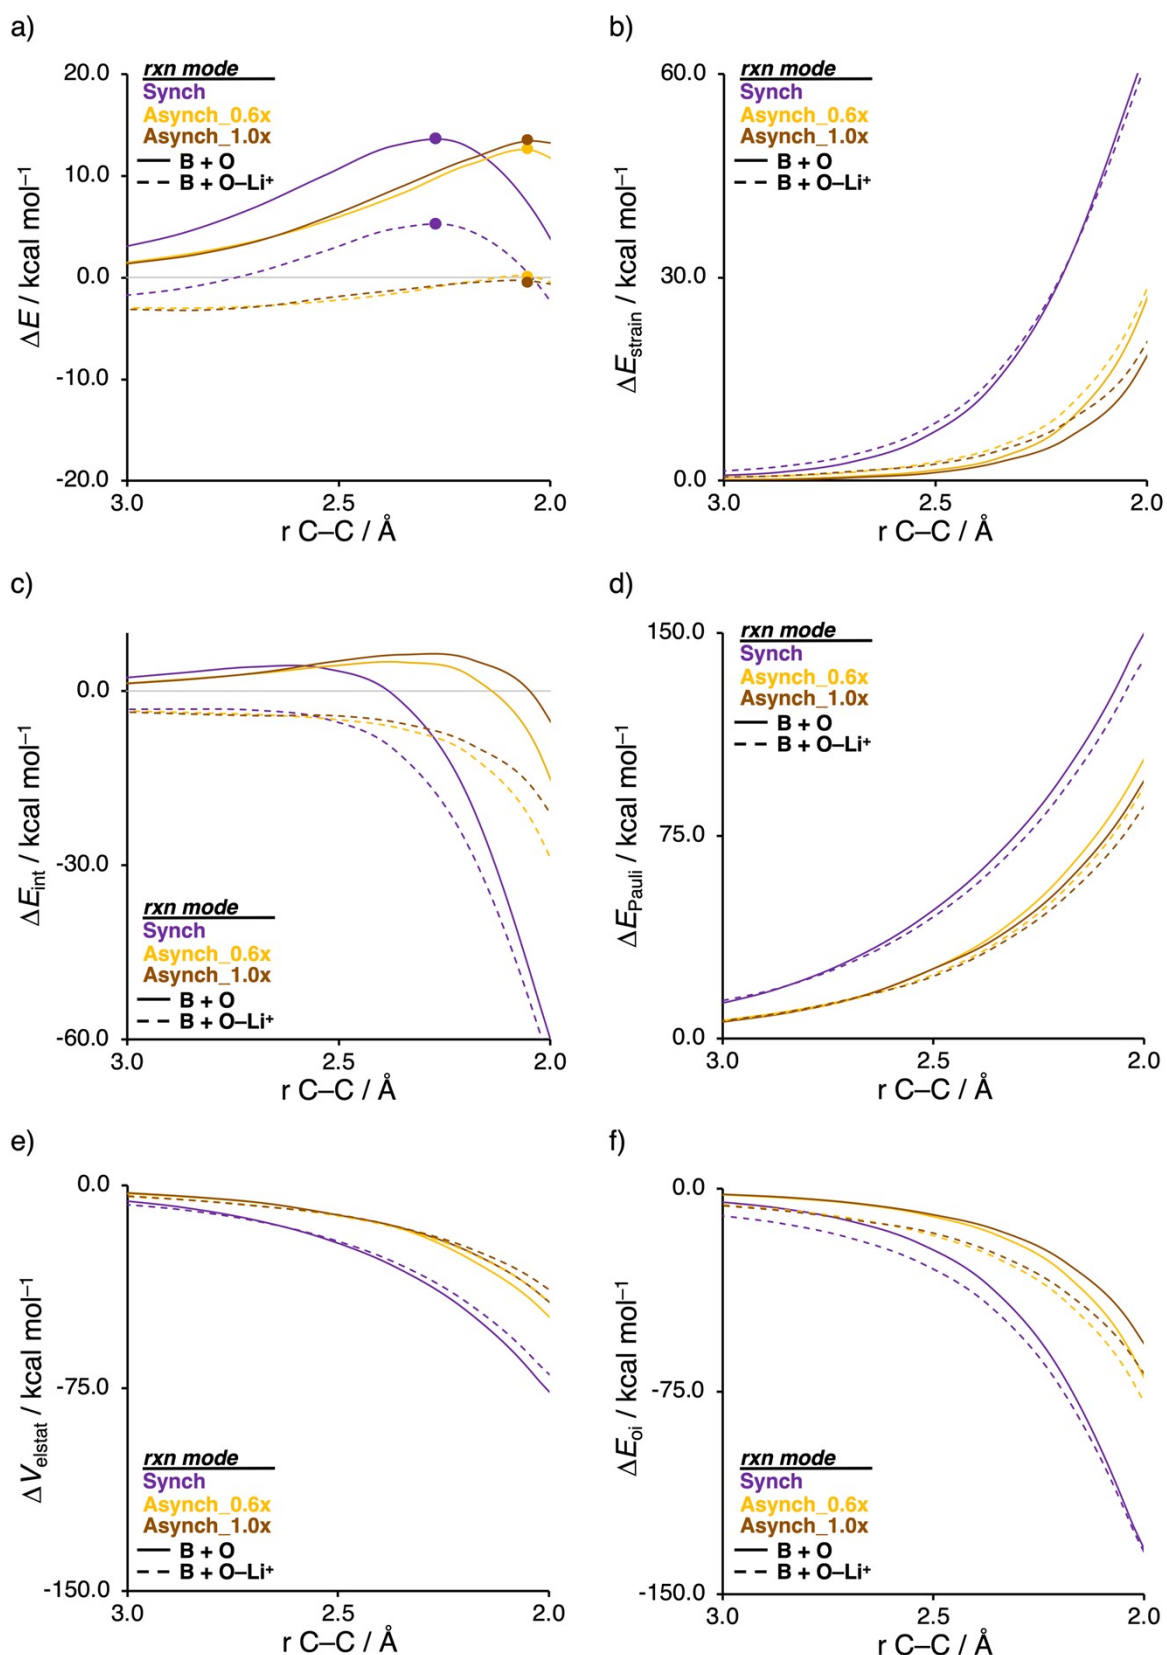

**Fig. S7** Activation strain analyses of the artificially constraint synchronous, asynchronous and stepwise Diels-Alder reaction mode (*rxn mode*) of **B** with **O** and **O-Li<sup>+</sup>** (dot indicates TS) along the IRC projected onto the shorter newly forming a C<sub>B</sub>•••C<sub>β</sub> bond, computed at ZORA-BP86/TZ2P: (a) total energy, (b) strain energy, (c) interaction energy, (d) Pauli repulsion, (e) electrostatic interaction, and (f) orbital interactions.

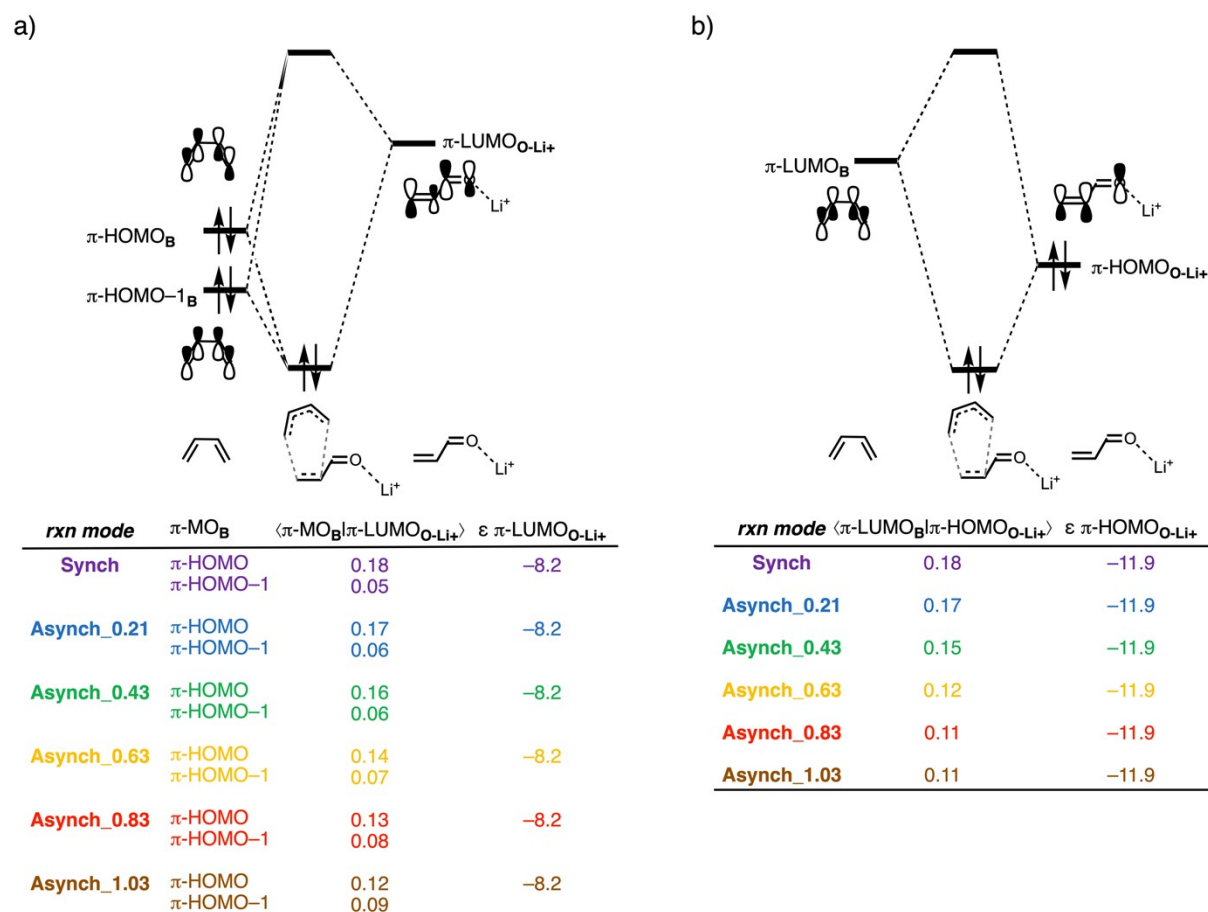

**Fig. S8** (a) Normal and (b) inverse electron demand orbital interaction diagrams with key overlaps and orbital energies, at consistent transition state-like geometries (shorter  $C_B \cdots C_\beta$  bond at 2.186 Å), of the artificially constraint synchronous, asynchronous, and stepwise Diels-Alder reaction mode (*rxn mode*) of **B** with **O-Li<sup>+</sup>**, computed at ZORA-BP86/TZ2P.

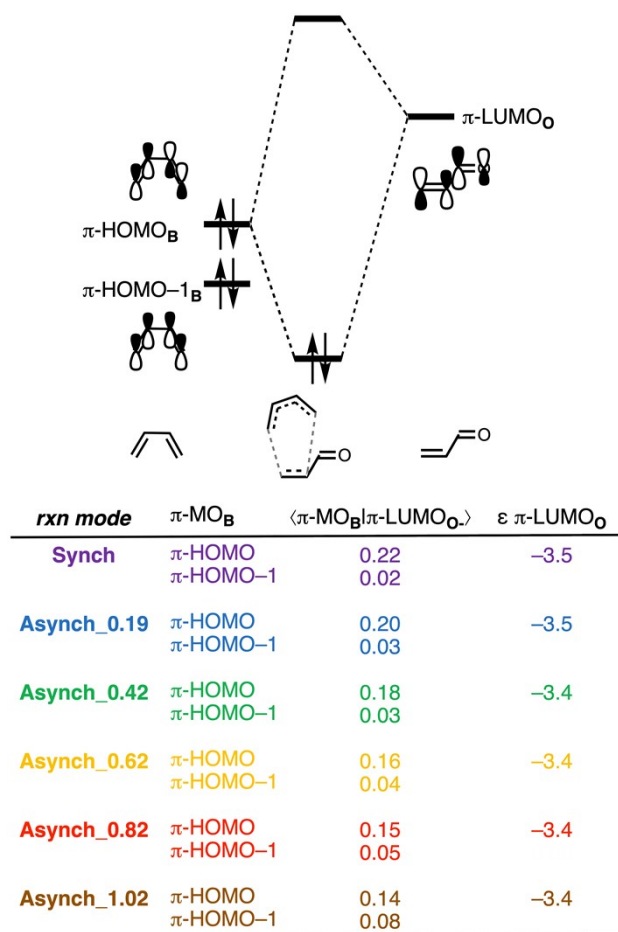

**Fig. S9** Normal electron demand orbital interaction diagrams with key overlaps and orbital energies, at consistent transition state-like geometries (shorter  $C_B \cdots C_\beta$  bond at 2.186 Å), of the artificially constraint synchronous, asynchronous, and stepwise Diels-Alder reaction mode (*rxn mode*) of **B** with  $O^+$ , computed at ZORA-BP86/TZ2P.

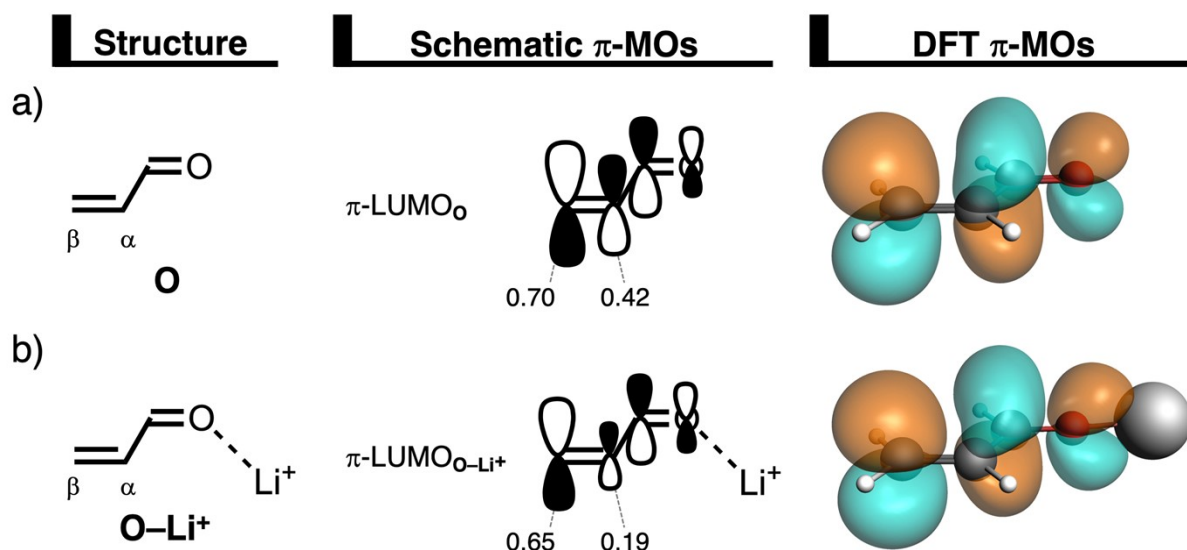

**Fig. S10** Key unoccupied  $\pi$ -MO (isovalue = 0.03 Bohr<sup>-3/2</sup>) computed at the equilibrium structures of (a) **O** and (b) **O-Li<sup>+</sup>**, where the MO-coefficients of the carbon and oxygen  $2p_z$  atomic orbitals, contributing to the unoccupied orbitals, are shown in the schematic  $\pi$ -MOs, computed at ZORA-BP86/TZ2P.

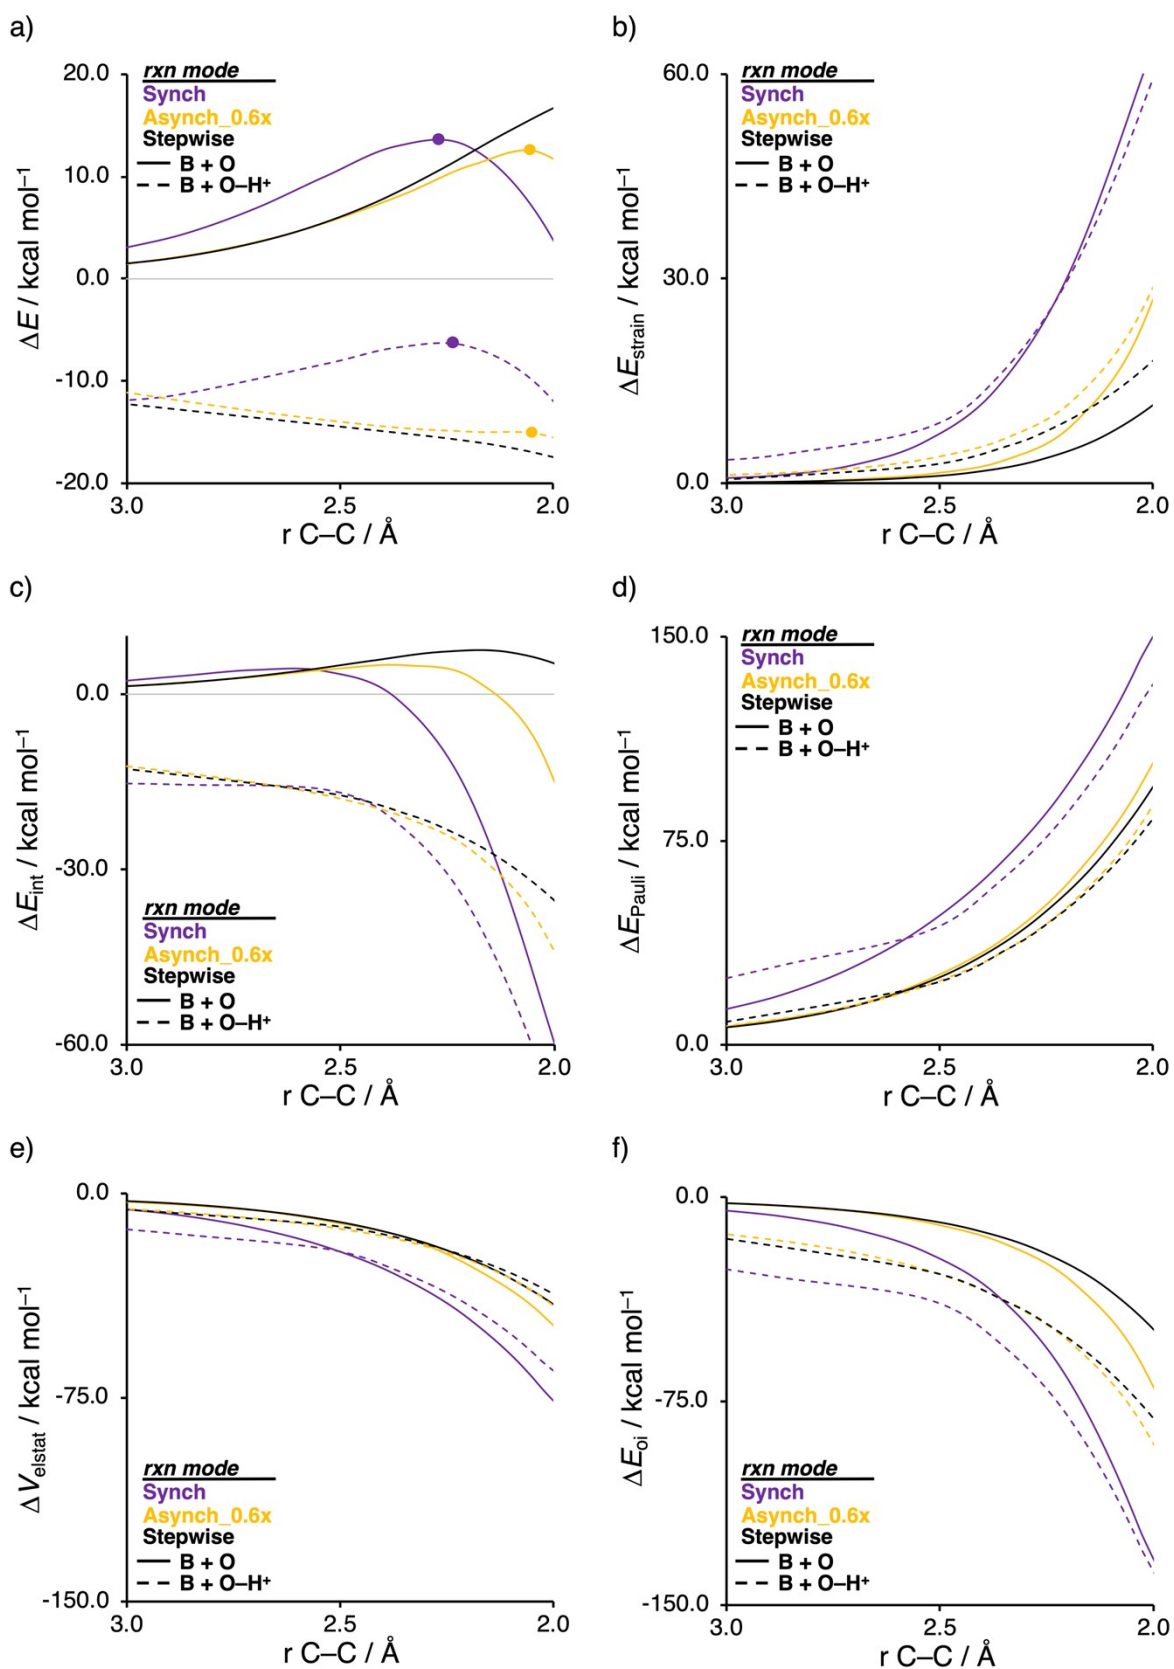

**Fig. S11** Activation strain analyses of the artificially constraint synchronous, asynchronous and stepwise Diels-Alder reaction mode (rxn mode) of **B** with **O** and **O-H<sup>+</sup>** (dot indicates TS) along the IRC projected onto the shorter newly forming a  $C_B \cdots C_\beta$  bond, computed at ZORA-BP86/TZ2P: (a) total energy, (b) strain energy, (c) interaction energy, (d) Pauli repulsion, (e) electrostatic interaction, and (f) orbital interactions.

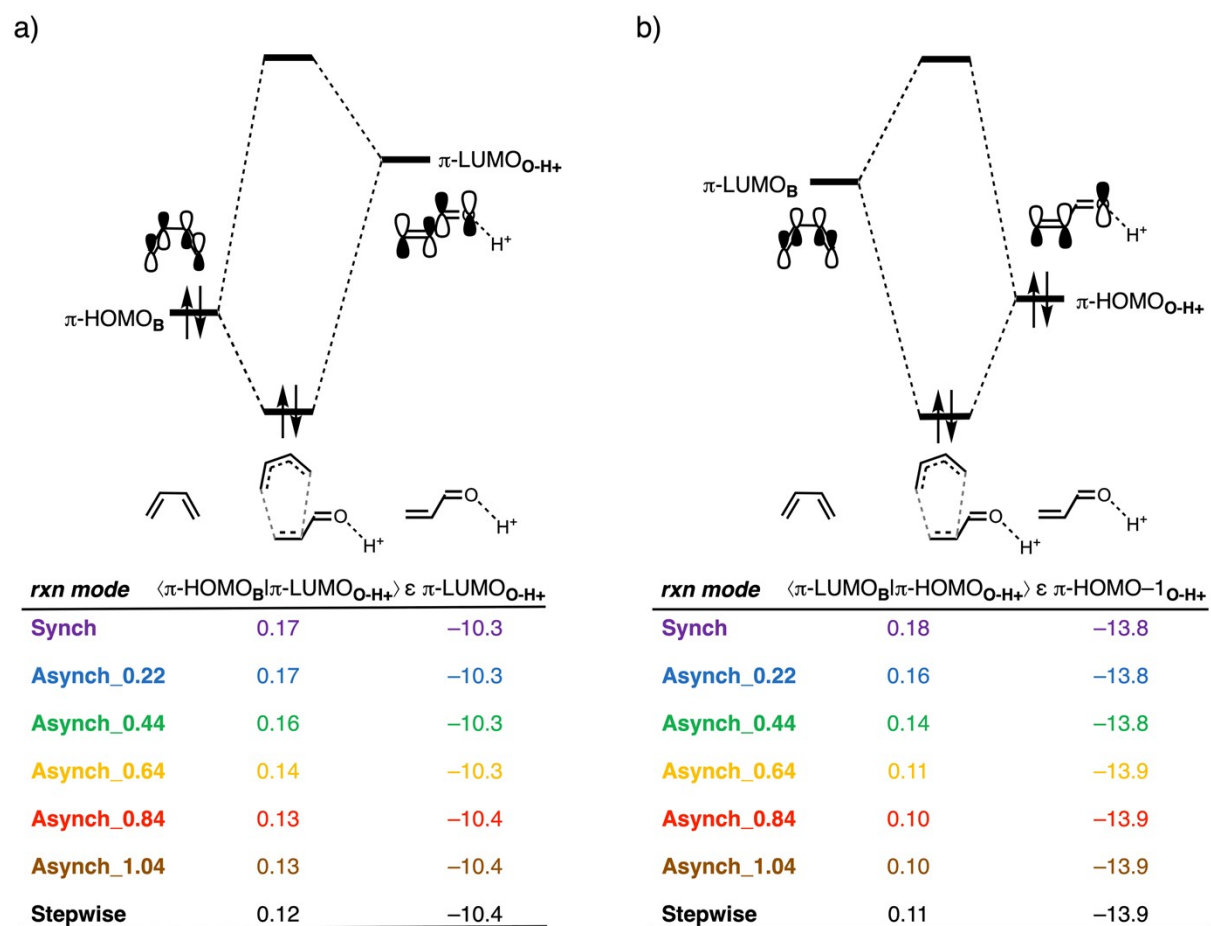

**Fig. S12** (a) Normal and (b) inverse electron demand orbital interaction diagrams with key overlaps and orbital energies, at consistent transition state-like geometries (shorter  $C_B \cdots C_\beta$  bond at 2.186 Å), of the artificially constraint synchronous, asynchronous, and stepwise Diels-Alder reaction mode (*rxn mode*) of **B** with  $\text{O-H}^+$ , computed at ZORA-BP86/TZ2P.



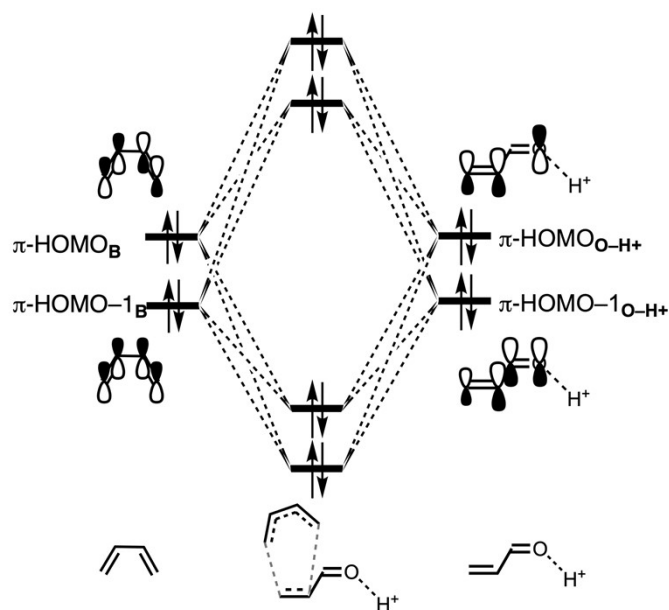

| <i>rxn mode</i>    | $\langle \pi\text{-HOMO}_B   \pi\text{-HOMO}_{O-H^+} \rangle$ | $\langle \pi\text{-HOMO-1}_B   \pi\text{-HOMO}_{O-H^+} \rangle$ | $\langle \pi\text{-HOMO-1}_B   \pi\text{-HOMO-1}_{O-H^+} \rangle$ |
|--------------------|---------------------------------------------------------------|-----------------------------------------------------------------|-------------------------------------------------------------------|
| <b>Synch</b>       | 0.00                                                          | 0.16                                                            | 0.05                                                              |
| <b>Asynch_0.22</b> | 0.02                                                          | 0.15                                                            | 0.05                                                              |
| <b>Asynch_0.44</b> | 0.04                                                          | 0.14                                                            | 0.05                                                              |
| <b>Asynch_0.64</b> | 0.07                                                          | 0.12                                                            | 0.04                                                              |
| <b>Asynch_0.84</b> | 0.08                                                          | 0.11                                                            | 0.02                                                              |
| <b>Asynch_1.04</b> | 0.09                                                          | 0.11                                                            | 0.02                                                              |
| <b>Stepwise</b>    | 0.10                                                          | 0.08                                                            | 0.01                                                              |

**Fig. S13** Closed-shell orbital interaction diagrams with key overlaps, at consistent transition state-like geometries (shorter  $C_B \cdots C_\beta$  bond at 2.186Å), of the artificially constraint synchronous, asynchronous, and stepwise Diels-Alder reaction modes (*rxn mode*) of **B** with **O-H<sup>+</sup>**, computed at ZORA-BP86/TZ2P.



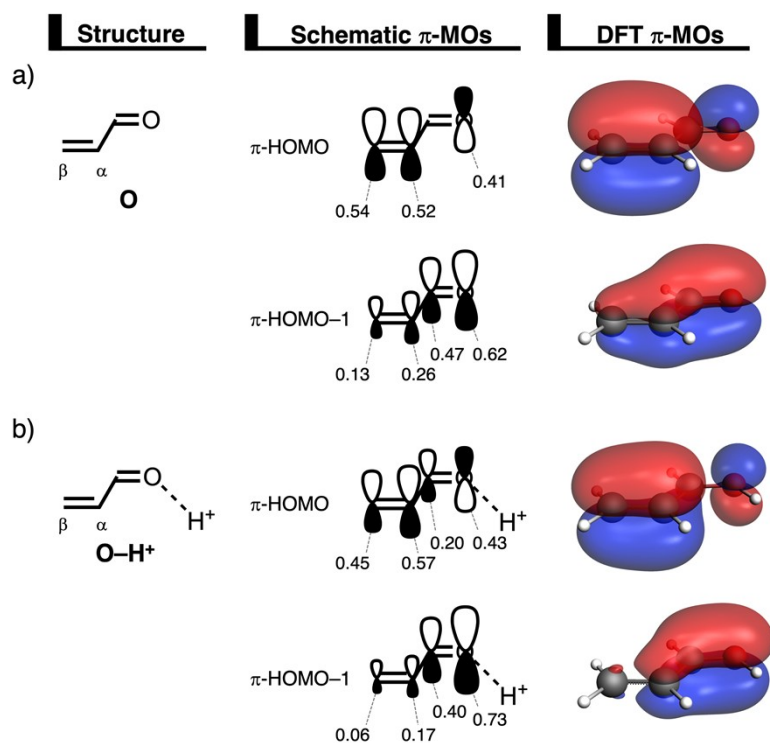

**Fig. S14** Key occupied  $\pi$ -MOs (isovalue = 0.03 Bohr<sup>-3/2</sup>) computed at the equilibrium structures of (a) **O** and (b) **O-H<sup>+</sup>**, where the MO-coefficients of the carbon and oxygen 2p<sub>z</sub> atomic orbitals, contributing to the occupied orbitals, are shown in the schematic  $\pi$ -MOs, computed at ZORA-BP86/TZ2P.

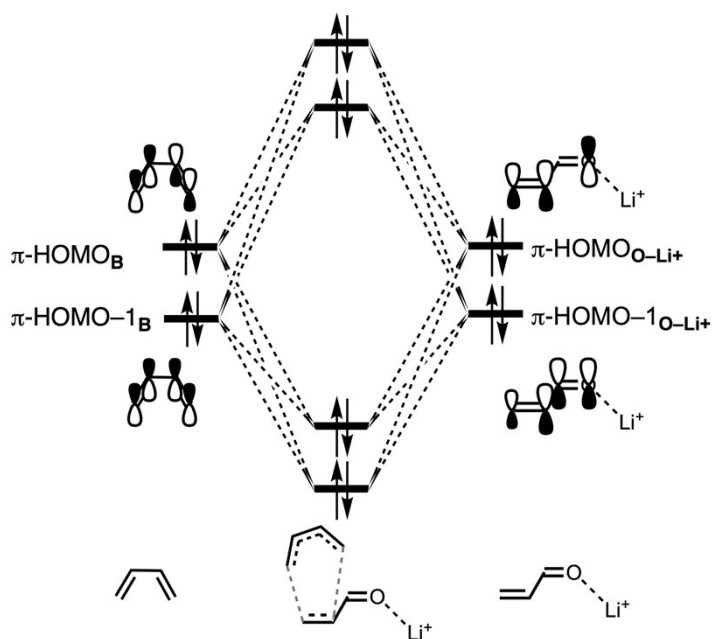

| <i>rxn mode</i>    | $\langle \pi\text{-HOMO}_B   \pi\text{-HOMO}_{O\text{-Li}^+} \rangle$ | $\langle \pi\text{-HOMO-1}_B   \pi\text{-HOMO}_{O\text{-Li}^+} \rangle$ | $\langle \pi\text{-HOMO-1}_B   \pi\text{-HOMO-1}_{O\text{-Li}^+} \rangle$ |
|--------------------|-----------------------------------------------------------------------|-------------------------------------------------------------------------|---------------------------------------------------------------------------|
| <b>Synch</b>       | 0.00                                                                  | 0.17                                                                    | 0.06                                                                      |
| <b>Asynch_0.21</b> | 0.02                                                                  | 0.16                                                                    | 0.04                                                                      |
| <b>Asynch_0.43</b> | 0.04                                                                  | 0.15                                                                    | 0.05                                                                      |
| <b>Asynch_0.63</b> | 0.07                                                                  | 0.13                                                                    | 0.05                                                                      |
| <b>Asynch_0.83</b> | 0.08                                                                  | 0.12                                                                    | 0.04                                                                      |
| <b>Asynch_1.03</b> | 0.09                                                                  | 0.11                                                                    | 0.04                                                                      |

**Fig. S15** Closed-shell orbital interaction diagrams with key overlaps, at consistent transition state-like geometries (shorter  $C_B \cdots C_\beta$  bond at 2.186Å), of the artificially constraint synchronous, asynchronous, and stepwise Diels-Alder reaction modes (*rxn mode*) of **B** with **O-Li<sup>+</sup>**, computed at ZORA-BP86/TZ2P.

**Table S3** Cartesian coordinates (in Å), energies (in kcal mol<sup>-1</sup>), and number of imaginary frequencies of all stationary points, computed at ZORA-BP86/TZ2P.

**1,3-butadiene (B)**

**E** = -1293.71

**H** = -1238.39

**G** = -1258.36

**N<sub>imag</sub>** = 0

|   |           |           |           |
|---|-----------|-----------|-----------|
| C | 1.372709  | -0.713395 | -0.499580 |
| C | 0.701805  | -0.211221 | 0.547604  |
| C | -0.701805 | 0.211220  | 0.547604  |
| C | -1.372709 | 0.713394  | -0.499580 |
| H | 0.889339  | -0.878856 | -1.463378 |
| H | 2.423105  | -0.989233 | -0.417892 |
| H | 1.222329  | -0.125437 | 1.506398  |
| H | -1.222329 | 0.125438  | 1.506398  |
| H | -0.889339 | 0.878856  | -1.463378 |
| H | -2.423105 | 0.989233  | -0.417892 |

**Acrylaldehyde (O)**

**E** = -1079.86

**H** = -1039.30

**G** = -1059.22

**N<sub>imag</sub>** = 0

|   |           |           |           |
|---|-----------|-----------|-----------|
| O | -1.805437 | -0.128643 | 0.000101  |
| C | -0.681419 | 0.344494  | 0.000020  |
| H | -0.520914 | 1.454121  | -0.000072 |
| C | 0.558854  | -0.450420 | 0.000033  |
| C | 1.757915  | 0.146949  | -0.000061 |
| H | 0.445846  | -1.536537 | 0.000121  |
| H | 2.689984  | -0.416496 | -0.000054 |
| H | 1.836090  | 1.236572  | -0.000148 |

**AlCl<sub>3</sub>-Acrylaldehyde (O-AlCl<sub>3</sub>)**

**E** = -1434.84

**H** = -1385.54

**G** = -1417.50

**N<sub>imag</sub>** = 0

|    |           |           |           |
|----|-----------|-----------|-----------|
| O  | 0.661512  | 0.025306  | -0.051897 |
| C  | 1.905924  | -0.059650 | 0.019823  |
| H  | 2.418889  | 0.321265  | 0.922761  |
| C  | 2.692720  | -0.640167 | -1.040494 |
| C  | 4.030247  | -0.709275 | -0.913250 |
| H  | 2.163919  | -1.008038 | -1.920882 |
| H  | 4.659268  | -1.140322 | -1.690596 |
| H  | 4.529909  | -0.332264 | -0.019317 |
| Al | -0.547375 | 0.758364  | 1.249338  |
| Cl | 0.797970  | 1.373286  | 2.792993  |
| Cl | -1.743858 | -0.922534 | 1.712922  |
| Cl | -1.447726 | 2.330189  | 0.158450  |

**Li<sup>+</sup>-Acrylaldehyde (O-Li<sup>+</sup>)****E** = -1001.73**H** = -958.54**G** = -980.98**N<sub>imag</sub>** = 0

|    |           |           |           |
|----|-----------|-----------|-----------|
| O  | 0.799212  | 0.202108  | 0.348660  |
| C  | 2.025686  | 0.024055  | 0.220272  |
| H  | 2.701840  | 0.348387  | 1.035977  |
| C  | 2.638667  | -0.584087 | -0.932494 |
| C  | 3.978469  | -0.730840 | -0.969424 |
| H  | 1.993175  | -0.911345 | -1.749145 |
| H  | 4.483131  | -1.185514 | -1.820907 |
| H  | 4.606522  | -0.396611 | -0.141414 |
| Li | -0.874351 | 0.547703  | 0.739051  |

**H<sup>+</sup>-Acrylaldehyde (O-H<sup>+</sup>)****E** = -986.78**H** = -937.74**G** = -957.75**N<sub>imag</sub>** = 0

|   |          |           |           |
|---|----------|-----------|-----------|
| O | 0.618001 | 0.031444  | -0.043262 |
| C | 1.899998 | -0.086289 | -0.034326 |
| H | 2.352990 | 0.307356  | 0.882297  |
| C | 2.689077 | -0.650903 | -1.061715 |
| C | 4.036599 | -0.699761 | -0.895144 |
| H | 2.209405 | -1.035759 | -1.965222 |
| H | 4.686323 | -1.126018 | -1.659989 |
| H | 4.514715 | -0.315040 | 0.007768  |
| H | 0.188585 | -0.316764 | -0.859818 |

**TS: O + B****E** = -2361.37**H** = -2264.59**G** = -2291.35**N<sub>imag</sub>** = 1, n = -391.095i cm<sup>-1</sup>

|   |           |           |           |
|---|-----------|-----------|-----------|
| C | -0.984945 | 0.969366  | 0.286069  |
| C | -0.051477 | 1.632967  | -0.508167 |
| H | 0.347730  | 2.584704  | -0.159161 |
| C | -2.044892 | 0.151645  | -0.298464 |
| O | -3.075323 | -0.188802 | 0.272101  |
| H | -1.866135 | -0.126365 | -1.370893 |
| H | -1.112862 | 1.242784  | 1.335295  |
| H | -0.144688 | 1.548578  | -1.591315 |
| C | 0.171966  | -1.246589 | 0.877796  |
| C | 0.854625  | -1.463843 | -0.292425 |
| C | 1.702813  | -0.498494 | -0.877605 |
| C | 1.864892  | 0.773308  | -0.342725 |
| H | 2.486204  | 1.494146  | -0.874279 |
| H | -0.593770 | -1.940668 | 1.219214  |
| H | 0.610925  | -2.349423 | -0.883038 |
| H | 2.062548  | -0.687178 | -1.891227 |
| H | 0.498726  | -0.505853 | 1.602924  |
| H | 1.833905  | 0.915851  | 0.736306  |

**P: O + B**

**E** = -2409.61

**H** = -2309.97

**G** = -2335.91

**N<sub>imag</sub>** = 0

|   |           |           |           |
|---|-----------|-----------|-----------|
| C | -0.591977 | -0.109794 | -0.417378 |
| C | 0.740295  | 0.005527  | -1.192978 |
| H | 0.554100  | 0.369258  | -2.213001 |
| C | -1.548123 | -0.998101 | -1.177552 |
| O | -2.608033 | -0.650478 | -1.656805 |
| H | -1.196486 | -2.060835 | -1.286574 |
| H | -1.053708 | 0.885308  | -0.334941 |
| H | 1.188224  | -0.997325 | -1.283325 |
| C | -0.337115 | -0.687748 | 0.991389  |
| C | 0.866950  | -0.075970 | 1.657170  |
| C | 1.775085  | 0.665679  | 1.013421  |
| C | 1.719020  | 0.937080  | -0.465611 |
| H | 2.724929  | 0.828288  | -0.900588 |
| H | -0.209329 | -1.784891 | 0.929841  |
| H | 0.976170  | -0.253073 | 2.729663  |
| H | 2.606766  | 1.101253  | 1.571714  |
| H | 1.438307  | 1.991085  | -0.637629 |
| H | -1.227981 | -0.531377 | 1.619211  |

**TS: O-AlCl<sub>3</sub> + B**

**E** = -2725.09

**H** = -2620.02

**G** = -2656.62

**N<sub>imag</sub>** = 1, **n** = -289.409 cm<sup>-1</sup>

|    |           |           |           |
|----|-----------|-----------|-----------|
| C  | -1.270422 | -1.342160 | -0.419335 |
| C  | -2.564712 | -1.703977 | -0.787237 |
| C  | -0.432752 | -0.623739 | -1.303490 |
| O  | 0.804662  | -0.380418 | -1.150239 |
| H  | -0.865255 | -0.300591 | -2.266089 |
| Al | 2.093779  | -0.332827 | 0.176152  |
| Cl | 1.442018  | -1.584127 | 1.798296  |
| Cl | 2.058481  | 1.741878  | 0.707423  |
| Cl | 3.856530  | -1.015856 | -0.779296 |
| H  | -0.839892 | -1.673798 | 0.527727  |
| H  | -3.023510 | -2.561156 | -0.296020 |
| H  | -2.893373 | -1.533964 | -1.812234 |
| C  | -1.677477 | 1.423191  | 0.343245  |
| C  | -2.759139 | 1.600996  | -0.467480 |
| C  | -3.870220 | 0.714682  | -0.517920 |
| C  | -3.965946 | -0.463122 | 0.203891  |
| H  | -4.866295 | -1.067788 | 0.102583  |
| H  | -0.792716 | 2.055157  | 0.269755  |
| H  | -2.736371 | 2.412356  | -1.197826 |
| H  | -4.616615 | 0.899613  | -1.294023 |
| H  | -3.439668 | -0.575638 | 1.149934  |
| H  | -1.677178 | 0.706924  | 1.162703  |

**P: O-AlCl<sub>3</sub> + B**

**E** = -2762.86

**H** = -2654.50

**G** = -2692.34

**N<sub>imag</sub>** = 0

|    |           |           |           |
|----|-----------|-----------|-----------|
| C  | -1.371561 | 0.116758  | -0.454102 |
| C  | -2.125160 | -1.241993 | -0.615992 |
| C  | -0.161441 | 0.059146  | -1.296134 |
| O  | 1.018316  | 0.001998  | -0.912620 |
| H  | -0.314895 | 0.038325  | -2.393458 |
| C  | -2.283272 | 1.287010  | -0.900322 |
| C  | -3.676704 | 1.147607  | -0.347959 |
| C  | -4.153201 | 0.025897  | 0.200655  |
| C  | -3.363203 | -1.250120 | 0.288654  |
| H  | -4.000579 | -2.102703 | 0.007553  |
| Al | 1.849650  | -0.004602 | 0.826193  |
| Cl | 1.016428  | -1.759373 | 1.704302  |
| Cl | 3.903033  | -0.090766 | 0.351579  |
| Cl | 1.157040  | 1.823450  | 1.671179  |
| H  | -1.084453 | 0.242068  | 0.598855  |
| H  | -1.456289 | -2.071868 | -0.356627 |
| H  | -2.428776 | -1.362571 | -1.667155 |
| H  | -2.318567 | 1.348096  | -2.003285 |
| H  | -4.303539 | 2.040204  | -0.394514 |
| H  | -5.163592 | 0.017222  | 0.613757  |
| H  | -3.063728 | -1.434984 | 1.333910  |
| H  | -1.839560 | 2.233804  | -0.559077 |

**RC: O-Li<sup>+</sup> + B**

**E** = -2299.56

**H** = -2199.71

**G** = -2232.73

**N<sub>imag</sub>** = 0

|    |           |           |           |
|----|-----------|-----------|-----------|
| C  | -1.112844 | -1.647494 | 0.181177  |
| C  | -2.333170 | -2.143970 | -0.143491 |
| C  | -0.279611 | -1.062827 | -0.824537 |
| O  | 0.912274  | -0.712881 | -0.637908 |
| H  | -0.707653 | -0.964269 | -1.839235 |
| Li | 2.587655  | -0.310393 | -0.585032 |
| H  | -1.842981 | 1.270417  | 0.771410  |
| H  | -4.788117 | 0.199292  | -1.498161 |
| H  | -3.684542 | 0.036199  | 1.381030  |
| H  | -0.715879 | -1.720683 | 1.195243  |
| H  | -2.945914 | -2.676695 | 0.580922  |
| H  | -2.701683 | -2.111106 | -1.167901 |
| C  | -1.952010 | 1.649419  | -0.244850 |
| C  | -3.000922 | 1.326374  | -1.028012 |
| C  | -4.084181 | 0.414183  | -0.690290 |
| C  | -4.295424 | -0.180425 | 0.504888  |
| H  | -5.150429 | -0.837370 | 0.656204  |
| H  | -1.199947 | 2.358185  | -0.587954 |
| H  | -3.055237 | 1.772402  | -2.023928 |

**TS: O-Li<sup>+</sup> + B****E** = -2297.30**H** = -2197.67**G** = -2227.42**N<sub>imag</sub>** = 1, **n** = -264.495i cm<sup>-1</sup>

|    |           |           |           |
|----|-----------|-----------|-----------|
| C  | -1.274191 | -1.371044 | -0.250009 |
| C  | -2.545800 | -1.686449 | -0.731363 |
| C  | -0.323324 | -0.684604 | -1.036224 |
| O  | 0.902484  | -0.552789 | -0.736626 |
| H  | -0.662166 | -0.297030 | -2.015135 |
| Li | 2.597701  | -0.508357 | -0.585371 |
| H  | -4.583114 | 0.815694  | -1.446303 |
| H  | -1.804036 | 0.841151  | 1.200285  |
| H  | -3.536381 | -0.509553 | 1.139526  |
| H  | -0.953021 | -1.734514 | 0.728539  |
| H  | -3.066372 | -2.540251 | -0.299137 |
| H  | -2.776122 | -1.498303 | -1.779037 |
| C  | -1.793408 | 1.539735  | 0.366380  |
| C  | -2.817544 | 1.629121  | -0.523926 |
| C  | -3.886382 | 0.689636  | -0.614493 |
| C  | -4.005004 | -0.451579 | 0.158761  |
| H  | -4.885817 | -1.079078 | 0.030556  |
| H  | -0.961265 | 2.241091  | 0.330540  |
| H  | -2.789587 | 2.419347  | -1.276473 |

**P: O-Li<sup>+</sup> + B****E** = -2331.55**H** = -2229.38**G** = -2258.02**N<sub>imag</sub>** = 0

|    |           |           |           |
|----|-----------|-----------|-----------|
| C  | -1.411214 | 0.091952  | -0.317946 |
| C  | -2.162633 | -1.253539 | -0.581581 |
| C  | -0.128740 | 0.067402  | -1.039555 |
| O  | 0.993862  | 0.111467  | -0.512477 |
| H  | -0.181627 | -0.008224 | -2.146267 |
| C  | -2.282992 | 1.275481  | -0.828340 |
| C  | -3.708158 | 1.143762  | -0.359158 |
| C  | -4.233350 | 0.014508  | 0.123757  |
| C  | -3.472839 | -1.278390 | 0.215500  |
| H  | -4.096169 | -2.102160 | -0.164511 |
| Li | 2.641724  | 0.182507  | 0.078613  |
| H  | -5.267043 | 0.008665  | 0.472498  |
| H  | -3.275631 | -1.523347 | 1.272811  |
| H  | -1.856042 | 2.222332  | -0.465764 |
| H  | -1.221487 | 0.201062  | 0.759627  |
| H  | -1.529774 | -2.106833 | -0.304435 |
| H  | -2.377477 | -1.334101 | -1.657473 |
| H  | -2.246990 | 1.327050  | -1.930907 |
| H  | -4.314991 | 2.048833  | -0.418113 |

**Int: O-H<sup>+</sup> + B****E** = -2300.52**H** = -2194.09**G** = -2223.07**N<sub>imag</sub>** = 0

|   |           |           |           |
|---|-----------|-----------|-----------|
| C | -0.116018 | -1.329606 | -0.165990 |
| C | -1.400561 | -1.179303 | 0.531051  |
| H | -1.926786 | -2.130198 | 0.668503  |
| C | 0.233697  | -0.532740 | -1.210334 |
| O | 1.345225  | -0.620213 | -1.945635 |
| H | -0.415580 | 0.267589  | -1.572176 |
| H | 0.575624  | -2.103869 | 0.178816  |
| H | -2.061640 | -0.477231 | 0.010671  |
| C | -2.077850 | 2.231618  | 2.783758  |
| C | -2.849440 | 1.109895  | 2.881053  |
| C | -2.394211 | -0.202418 | 2.613315  |
| C | -1.126357 | -0.607330 | 2.065973  |
| H | 1.925586  | -1.343193 | -1.633320 |
| H | -2.491851 | 3.213502  | 3.010643  |
| H | -3.885236 | 1.215100  | 3.208283  |
| H | -3.126709 | -1.001173 | 2.769891  |
| H | -0.716866 | -1.478909 | 2.593325  |
| H | -1.029601 | 2.198367  | 2.486720  |
| H | -0.377026 | 0.186808  | 2.010720  |

**TS: O-H<sup>+</sup> + B****E** = -2300.00**H** = -2194.13**G** = -2221.31**N<sub>imag</sub>** = 1, n = -49.296i cm<sup>-1</sup>

|   |           |           |           |
|---|-----------|-----------|-----------|
| C | -1.299393 | -0.627633 | -1.305275 |
| C | -1.010280 | -0.584619 | 0.130926  |
| H | -1.521806 | -1.361703 | 0.708771  |
| C | -1.741209 | 0.463969  | -1.987148 |
| O | -2.088396 | 0.515076  | -3.274856 |
| H | -1.883157 | 1.432033  | -1.501634 |
| H | -1.153705 | -1.573817 | -1.834563 |
| H | -1.274015 | 0.387622  | 0.563538  |
| C | 2.312837  | 1.578848  | -0.161860 |
| C | 1.772875  | 1.273583  | 1.053171  |
| C | 1.042300  | 0.091582  | 1.325022  |
| C | 0.616557  | -0.903299 | 0.379299  |
| H | 0.652241  | -1.918759 | 0.787057  |
| H | 2.850235  | 2.514321  | -0.313801 |
| H | 1.909909  | 1.972877  | 1.879640  |
| H | 0.680441  | -0.027489 | 2.351093  |
| H | 2.242336  | 0.909411  | -1.019033 |
| H | 1.125444  | -0.864668 | -0.585937 |
| H | -1.983170 | -0.354642 | -3.710418 |



**P: O-H<sup>+</sup> + B**

**E** = -2319.13

**H** = -2211.37

**G** = -2237.64

**N<sub>imag</sub>** = 0

|   |           |           |           |
|---|-----------|-----------|-----------|
| C | -1.439060 | -0.020867 | -0.376903 |
| C | -2.117330 | -0.199402 | 1.044735  |
| C | -0.049657 | -0.380647 | -0.299925 |
| O | 0.955186  | 0.399593  | -0.488268 |
| H | 0.265065  | -1.403012 | -0.056268 |
| C | -2.190446 | -0.975604 | -1.380391 |
| C | -3.660233 | -0.662385 | -1.341980 |
| C | -4.270501 | -0.085564 | -0.301024 |
| C | -3.561901 | 0.303441  | 0.962000  |
| H | -4.099751 | -0.117134 | 1.828027  |
| H | 0.687283  | 1.322818  | -0.711648 |
| H | -3.611039 | 1.396601  | 1.095207  |
| H | -5.334905 | 0.144172  | -0.359834 |
| H | -1.794476 | -0.829167 | -2.394748 |
| H | -1.554319 | 1.026258  | -0.702344 |
| H | -1.555852 | 0.352710  | 1.807545  |
| H | -2.088036 | -1.265844 | 1.303600  |
| H | -1.988425 | -2.022143 | -1.103645 |
| H | -4.218901 | -0.891448 | -2.250845 |
